# Supplementary material for: A Method to Evaluate and Eliminate Fungal Contamination in Household Air Conditioners
Source: Hindawi journal article supplement (doi:10.1155/2023/8984619), 2023-05-22
Supplement: f1 [file 8984619.f1.doc]

**Supporting Information**

**A** **method to evaluate and eliminate fungal contamination in household air conditioners**

Yoshiki Shiraishi, Kazuhiro Harada, Chikao Maeda, Fumitoshi Ogino, Yu Suzuki, Naoki Okada, Katsuyoshi Tomomatsu, Yoshika Sekine, U Yanagi, Tadashi Imanishi, Tsuyoshi Oguma, and Koichiro Asano

**Table S1**. Top 30 fungal genera in indoor air, house dust, swab samples, and cleaning effluents of ACs in the living room

| Rank order | Genus | Detection Frequently | % of Total Fungal Read (Median) | % of Total Fungal Read (IQR1) | % of Total Fungal Read  (IQR3) |
| --- | --- | --- | --- | --- | --- |
| 1 | *Cladosporium* | 88 | 16.91 | 7.49 | 36.43 |
| 2 | *Toxicocladosporium* | 79 | 22.62 | 9.05 | 43.28 |
| 3 | *Aureobasidium* | 35 | 9.43 | 3.29 | 19.93 |
| 4 | *Aspergillus* | 31 | 5.37 | 2.09 | 14.27 |
| 4 | *Rhodotorula* | 31 | 9.65 | 3.13 | 23.83 |
| 6 | *Neoantrodiella* | 26 | 5.36 | 3.01 | 9.17 |
| 7 | *Alternaria* | 23 | 4.12 | 1.76 | 4.72 |
| 8 | *Trametes* | 21 | 3.14 | 2.17 | 5.78 |
| 9 | *Acrodontium* | 19 | 6.28 | 2.57 | 27.33 |
| 10 | *Phlebia* | 17 | 1.71 | 1.38 | 2.21 |
| 11 | *Pseudopithomyces* | 16 | 2.25 | 1.31 | 5.10 |
| 12 | *Candida* | 15 | 1.66 | 1.17 | 3.64 |
| 12 | *Hyphodontia* | 15 | 2.87 | 1.55 | 4.54 |
| 12 | *Penicillium* | 15 | 7.16 | 2.71 | 15.71 |
| 15 | *Curvularia* | 14 | 3.39 | 2.17 | 6.32 |
| 15 | *Exophiala* | 14 | 7.55 | 3.92 | 15.89 |
| 15 | *Sterigmatomyces* | 14 | 5.84 | 2.62 | 14.22 |
| 18 | *Ganoderma* | 13 | 1.96 | 1.20 | 3.37 |
| 18 | *Zasmidium* | 13 | 2.00 | 1.74 | 4.03 |
| 19 | *Ceriporia* | 12 | 1.87 | 1.25 | 3.04 |
| 19 | *Peniophorella* | 12 | 2.47 | 2.21 | 5.36 |
| 19 | *Schizophyllum* | 12 | 2.00 | 1.49 | 2.50 |
| 19 | *Talaromyces* | 12 | 2.73 | 1.24 | 7.68 |
| 24 | *Peniophora* | 11 | 2.14 | 1.85 | 3.29 |
| 24 | *Simplicillium* | 11 | 3.12 | 1.87 | 5.10 |
| 24 | *Sporidiobolus* | 11 | 4.59 | 1.49 | 6.47 |
| 27 | *Knufia* | 10 | 2.30 | 1.78 | 2.99 |
| 27 | *Lachnum* | 10 | 3.76 | 1.55 | 7.46 |
| 27 | *Meyerozyma* | 10 | 3.59 | 2.92 | 7.09 |
| 30 | *Naganishia* | 9 | 4.01 | 1.87 | 6.30 |
| 30 | *Phoma* | 9 | 1.58 | 1.30 | 3.47 |

**Table S2**. Top 30 fungal genera in filters of ACs

| Rank order | Genus | Detection Frequently | % of Total Fungal Read (Median) | % of Total Fungal Read (IQR1) | % of Total Fungal Read  (IQR3) |
| --- | --- | --- | --- | --- | --- |
| 1 | *Cladosporium* | 14 | 10.75 | 3.24 | 21.88 |
| 2 | *Neoantrodiella* | 11 | 6.66 | 5.36 | 10.39 |
| 2 | *Phlebia* | 11 | 1.71 | 1.52 | 2.09 |
| 2 | *Trametes* | 11 | 2.35 | 1.98 | 4.19 |
| 5 | *Toxicocladosporium* | 10 | 21.60 | 10.78 | 32.91 |
| 6 | *Ceriporia* | 9 | 2.03 | 1.41 | 3.74 |
| 7 | *Hyphodontia* | 8 | 2.39 | 1.62 | 4.33 |
| 8 | *Peniophorella* | 8 | 2.39 | 1.65 | 3.65 |
| 9 | *Ganoderma* | 7 | 1.58 | 1.24 | 2.66 |
| 9 | *Microporus* | 7 | 1.45 | 1.39 | 1.90 |
| 9 | *Schizophyllum* | 7 | 2.12 | 1.57 | 2.29 |
| 9 | *Bjerkandera* | 7 | 2.30 | 1.30 | 3.24 |
| 13 | *Rigidoporus* | 6 | 2.17 | 1.35 | 2.57 |
| 13 | *Peniophora* | 6 | 1.93 | 1.66 | 2.10 |
| 14 | *Aspergillus* | 5 | 8.54 | 4.89 | 21.70 |
| 14 | *Pseudopithomyces* | 5 | 2.33 | 1.16 | 2.72 |
| 14 | *Phellinus* | 5 | 1.83 | 1.73 | 2.08 |
| 18 | *Resinicium* | 4 | 3.08 | 2.57 | 3.33 |
| 18 | *Xeromphalina* | 4 | 1.83 | 1.17 | 2.69 |
| 18 | *Curvularia* | 4 | 2.16 | 1.85 | 4.46 |
| 21 | *Alternaria* | 3 | 1.86 | 1.44 | 2.06 |
| 21 | *Mycoacia* | 3 | 2.27 | 1.64 | 3.58 |
| 21 | *Ophiosphaerella* | 3 | 3.02 | 3.01 | 3.36 |
| 21 | *Perenniporia* | 3 | 1.90 | 1.71 | 2.07 |
| 21 | *Rhodotorula* | 3 | 2.90 | 1.96 | 5.44 |
| 21 | *Sidera* | 3 | 2.70 | 1.93 | 3.81 |
| 21 | *Steccherinum* | 3 | 2.29 | 2.12 | 3.32 |
| 21 | *Xylodon* | 3 | 1.39 | 1.18 | 1.50 |
| 21 | *Cerrena* | 3 | 1.33 | 1.17 | 1.90 |
| 21 | *Stereum* | 3 | 1.41 | 1.26 | 3.53 |
| 21 | *Wallemia* | 3 | 1.74 | 1.46 | 2.03 |
| 21 | *Zasmidium* | 3 | 2.04 | 1.93 | 3.03 |

**Table S3.** Top 30 fungal genera in heat exchangers of ACs

| Rank order | Genus | Detection Frequently | % of Total Fungal Read (Median) | % of Total Fungal Read (IQR1) | % of Total Fungal Read  (IQR3) |
| --- | --- | --- | --- | --- | --- |
| 1 | *Toxicocladosporium* | 14 | 44.37 | 11.36 | 58.21 |
| 1 | *Cladosporium* | 14 | 13.68 | 1.57 | 42.25 |
| 3 | *Aureobasidium* | 9 | 21.66 | 4.27 | 23.45 |
| 4 | *Neoantrodiella* | 5 | 2.10 | 1.98 | 3.67 |
| 5 | *Aspergillus* | 3 | 2.33 | 2.26 | 24.17 |
| 5 | *Ganoderma* | 3 | 1.20 | 1.10 | 2.66 |
| 5 | *Rhodotorula* | 3 | 2.43 | 1.84 | 24.91 |
| 5 | *Pseudopithomyces* | 3 | 1.87 | 1.53 | 13.24 |
| 9 | *Solicoccozyma* | 2 | 1.74 | 1.37 | 2.12 |
| 9 | *Perenniporia* | 2 | 3.98 | 3.70 | 4.27 |
| 9 | *Trametes* | 2 | 5.31 | 3.56 | 7.05 |
| 9 | *Resinicium* | 2 | 2.42 | 1.83 | 3.01 |
| 9 | *Neosetophoma* | 2 | 2.74 | 2.15 | 3.33 |
| 9 | *Exophiala* | 2 | 10.89 | 7.78 | 13.99 |
| 9 | *Didymella* | 2 | 3.45 | 2.60 | 4.29 |
| 9 | *Alternaria* | 2 | 1.82 | 1.51 | 2.13 |
| 9 | *Acrodontium* | 2 | 8.60 | 5.65 | 11.54 |
| 18 | *Talaromyces* | 1 | 1.07 | 1.07 | 1.07 |
| 18 | *Ceriporia* | 1 | 2.64 | 2.64 | 2.64 |
| 18 | *Pleurotus* | 1 | 4.86 | 4.86 | 4.86 |
| 18 | *Meripilus* | 1 | 2.15 | 2.15 | 2.15 |
| 18 | *Hypholoma* | 1 | 4.49 | 4.49 | 4.49 |
| 18 | *Hyphoderma* | 1 | 1.44 | 1.44 | 1.44 |
| 18 | *Dentipellis* | 1 | 1.85 | 1.85 | 1.85 |
| 18 | *Zasmidium* | 1 | 1.81 | 1.81 | 1.81 |
| 18 | *Yuchengia* | 1 | 1.13 | 1.13 | 1.13 |
| 18 | *Wallemia* | 1 | 1.11 | 1.11 | 1.11 |
| 18 | *Vanderbylia* | 1 | 1.10 | 1.10 | 1.10 |
| 18 | *Trichophyton* | 1 | 42.42 | 42.42 | 42.42 |
| 18 | *Tricholosporum* | 1 | 1.86 | 1.86 | 1.86 |
| 18 | *Stypella* | 1 | 4.76 | 4.76 | 4.76 |
| 18 | *Septoria* | 1 | 1.59 | 1.59 | 1.59 |
| 18 | *Schizophyllum* | 1 | 2.82 | 2.82 | 2.82 |
| 18 | *Ramaria* | 1 | 1.64 | 1.64 | 1.64 |
| 18 | *Pyrenochaetopsis* | 1 | 0.98 | 0.98 | 0.98 |
| 18 | *Psilocybe* | 1 | 1.95 | 1.95 | 1.95 |
| 18 | *Pseudomerulius* | 1 | 3.31 | 3.31 | 3.31 |
| 18 | *Psathyrella* | 1 | 2.60 | 2.60 | 2.60 |
| 18 | *Phlebia* | 1 | 1.92 | 1.92 | 1.92 |
| 18 | *Phialocephala* | 1 | 1.52 | 1.52 | 1.52 |
| 18 | *Phellinus* | 1 | 1.54 | 1.54 | 1.54 |
| 18 | *Phaeophleospora* | 1 | 1.25 | 1.25 | 1.25 |
| 18 | *Peniophora* | 1 | 3.08 | 3.08 | 3.08 |
| 18 | *Paraphoma* | 1 | 13.87 | 13.87 | 13.87 |
| 18 | *Ophiosphaerella* | 1 | 1.08 | 1.08 | 1.08 |
| 18 | *Ochroconis* | 1 | 2.49 | 2.49 | 2.49 |
| 18 | *Neophaeococcomyces* | 1 | 5.28 | 5.28 | 5.28 |
| 18 | *Naganishia* | 1 | 20.07 | 20.07 | 20.07 |
| 18 | *Lachnum* | 1 | 1.62 | 1.62 | 1.62 |
| 18 | *Knufia* | 1 | 2.10 | 2.10 | 2.10 |
| 18 | *Hyphozyma* | 1 | 1.48 | 1.48 | 1.48 |
| 18 | *Hymenula* | 1 | 1.38 | 1.38 | 1.38 |
| 18 | *Hohenbuehelia* | 1 | 3.69 | 3.69 | 3.69 |
| 18 | *Geastrum* | 1 | 1.38 | 1.38 | 1.38 |
| 18 | *Favolus* | 1 | 53.98 | 53.98 | 53.98 |
| 18 | *Cylindrobasidium* | 1 | 1.07 | 1.07 | 1.07 |
| 18 | *Curvularia* | 1 | 6.41 | 6.41 | 6.41 |
| 18 | *Cortinarius* | 1 | 8.76 | 8.76 | 8.76 |
| 18 | *Cladophialophora* | 1 | 3.97 | 3.97 | 3.97 |
| 18 | *Bjerkandera* | 1 | 1.59 | 1.59 | 1.59 |
| 18 | *Abundisporus* | 1 | 1.38 | 1.38 | 1.38 |

**Table S4.** Top 30 fungal genera in blower fans of ACs

| Rank order | Genus | Detection Frequently | % of Total Fungal Read (Median) | % of Total Fungal Read (IQR1) | % of Total Fungal Read  (IQR3) |
| --- | --- | --- | --- | --- | --- |
| 1 | *Toxicocladosporium* | 12 | 22.74 | 8.41 | 41.59 |
| 2 | *Cladosporium* | 11 | 13.52 | 10.53 | 23.29 |
| 3 | *Rhodotorula* | 6 | 13.88 | 7.88 | 22.69 |
| 4 | *Aureobasidium* | 5 | 9.75 | 7.93 | 14.58 |
| 5 | *Acrodontium* | 4 | 30.24 | 21.49 | 34.27 |
| 5 | *Alternaria* | 4 | 4.51 | 3.46 | 5.19 |
| 5 | *Lachnum* | 4 | 4.77 | 1.48 | 8.79 |
| 8 | *Aspergillus* | 3 | 2.66 | 1.94 | 4.42 |
| 8 | *Exophiala* | 3 | 12.31 | 6.83 | 31.14 |
| 8 | *Penicillium* | 3 | 15.07 | 8.79 | 26.08 |
| 8 | *Simplicillium* | 3 | 3.87 | 3.50 | 13.20 |
| 8 | *Sporidiobolus* | 3 | 1.21 | 1.15 | 4.28 |
| 8 | *Zasmidium* | 3 | 7.13 | 4.38 | 17.15 |
| 14 | *Meyerozyma* | 2 | 6.61 | 5.73 | 7.48 |
| 14 | *Naganishia* | 2 | 1.84 | 1.42 | 2.25 |
| 14 | *Neoantrodiella* | 2 | 11.07 | 10.11 | 12.04 |
| 14 | *Perenniporia* | 2 | 1.39 | 1.18 | 1.60 |
| 14 | *Phialocephala* | 2 | 4.98 | 3.55 | 6.41 |
| 14 | *Phlebia* | 2 | 3.17 | 2.11 | 4.22 |
| 14 | *Talaromyces* | 2 | 1.21 | 1.17 | 1.24 |
| 15 | *Abundisporus* | 1 | 1.61 | 1.61 | 1.61 |
| 15 | *Aurantiporus* | 1 | 1.19 | 1.19 | 1.19 |
| 15 | *Catenulomyces* | 1 | 4.32 | 4.32 | 4.32 |
| 15 | *Ceriporia* | 1 | 1.10 | 1.10 | 1.10 |
| 15 | *Coprinopsis* | 1 | 3.41 | 3.41 | 3.41 |
| 15 | *Coriolopsis* | 1 | 10.50 | 10.50 | 10.50 |
| 15 | *Diaporthe* | 1 | 2.77 | 2.77 | 2.77 |
| 15 | *Diplomitoporus* | 1 | 1.16 | 1.16 | 1.16 |
| 15 | *Eutypa* | 1 | 2.28 | 2.28 | 2.28 |
| 15 | *Gerronema* | 1 | 1.55 | 1.55 | 1.55 |
| 15 | *Hymenochaete* | 1 | 1.10 | 1.10 | 1.10 |
| 15 | *Hyphodontia* | 1 | 4.92 | 4.92 | 4.92 |
| 15 | *Knufia* | 1 | 3.18 | 3.18 | 3.18 |
| 15 | *Microporus* | 1 | 3.74 | 3.74 | 3.74 |
| 15 | *Mucronella* | 1 | 1.18 | 1.18 | 1.18 |
| 15 | *Neodevriesia* | 1 | 41.97 | 41.97 | 41.97 |
| 15 | *Phaeosphaeria* | 1 | 1.78 | 1.78 | 1.78 |
| 15 | *Phoma* | 1 | 1.58 | 1.58 | 1.58 |
| 15 | *Pseudowrightoporia* | 1 | 1.88 | 1.88 | 1.88 |
| 15 | *Pyrenochaetopsis* | 1 | 2.60 | 2.60 | 2.60 |
| 15 | *Ramularia* | 1 | 1.29 | 1.29 | 1.29 |
| 15 | *Resinicium* | 1 | 2.92 | 2.92 | 2.92 |
| 15 | *Rhodosporidiobolus* | 1 | 1.41 | 1.41 | 1.41 |
| 15 | *Scytinostroma* | 1 | 1.46 | 1.46 | 1.46 |
| 15 | *Stereum* | 1 | 7.25 | 7.25 | 7.25 |
| 15 | *Sterigmatomyces* | 1 | 2.24 | 2.24 | 2.24 |
| 15 | *Stypella* | 1 | 7.41 | 7.41 | 7.41 |
| 15 | *Tetrapyrgos* | 1 | 3.50 | 3.50 | 3.50 |
| 15 | *Trametes* | 1 | 3.14 | 3.14 | 3.14 |
| 15 | *Vanderbylia* | 1 | 1.00 | 1.00 | 1.00 |
| 15 | *Vishniacozyma* | 1 | 1.28 | 1.28 | 1.28 |
| 15 | *Xylodon* | 1 | 2.42 | 2.42 | 2.42 |

**Table S5.** Top 30 fungal genera in air vents of ACs

| Rank order | Genus | Detection Frequently | % of Total Fungal Read (Median) | % of Total Fungal Read (IQR1) | % of Total Fungal Read  (IQR3) |
| --- | --- | --- | --- | --- | --- |
| 1 | *Toxicocladosporium* | 14 | 37.96 | 11.11 | 50.46 |
| 2 | *Cladosporium* | 12 | 19.97 | 10.52 | 38.56 |
| 3 | *Acrodontium* | 4 | 2.10 | 1.71 | 7.69 |
| 3 | *Alternaria* | 4 | 2.98 | 2.31 | 3.54 |
| 3 | *Aureobasidium* | 4 | 14.78 | 9.14 | 20.36 |
| 3 | *Rhodotorula* | 4 | 25.80 | 18.96 | 29.52 |
| 3 | *Sporidiobolus* | 4 | 5.64 | 4.66 | 7.65 |
| 8 | *Candida* | 3 | 1.27 | 1.12 | 1.30 |
| 8 | *Knufia* | 3 | 2.45 | 2.36 | 2.90 |
| 8 | *Talaromyces* | 3 | 2.90 | 1.94 | 3.35 |
| 8 | *Zasmidium* | 3 | 1.74 | 1.37 | 1.87 |
| 12 | *Aspergillus* | 2 | 3.21 | 2.13 | 4.29 |
| 12 | *Neoantrodiella* | 2 | 7.47 | 6.62 | 8.32 |
| 12 | *Coprinellus* | 2 | 1.03 | 1.02 | 1.03 |
| 12 | *Hyphodontia* | 2 | 6.54 | 3.93 | 9.15 |
| 12 | *Meyerozyma* | 2 | 11.22 | 7.23 | 15.20 |
| 12 | *Peniophora* | 2 | 3.03 | 2.40 | 3.66 |
| 12 | *Schizophyllum* | 2 | 1.71 | 1.64 | 1.78 |
| 12 | *Sterigmatomyces* | 2 | 16.95 | 15.94 | 17.97 |
| 20 | *Xylodon* | 1 | 2.20 | 2.20 | 2.20 |
| 20 | *Abundisporus* | 1 | 1.32 | 1.32 | 1.32 |
| 20 | *Antrodia* | 1 | 1.51 | 1.51 | 1.51 |
| 20 | *Catenulomyces* | 1 | 2.67 | 2.67 | 2.67 |
| 20 | *Coriolopsis* | 1 | 1.55 | 1.55 | 1.55 |
| 20 | *Curvularia* | 1 | 5.37 | 5.37 | 5.37 |
| 20 | *Dactylella* | 1 | 7.46 | 7.46 | 7.46 |
| 20 | *Erythrobasidium* | 1 | 1.06 | 1.06 | 1.06 |
| 20 | *Exophiala* | 1 | 22.14 | 22.14 | 22.14 |
| 20 | *Filobasidium* | 1 | 1.56 | 1.56 | 1.56 |
| 20 | *Ganoderma* | 1 | 2.34 | 2.34 | 2.34 |
| 20 | *Gymnopilus* | 1 | 1.07 | 1.07 | 1.07 |
| 20 | *Inocybe* | 1 | 2.13 | 2.13 | 2.13 |
| 20 | *Junghuhnia* | 1 | 1.97 | 1.97 | 1.97 |
| 20 | *Membranomyces* | 1 | 0.97 | 0.97 | 0.97 |
| 20 | *Meripilus* | 1 | 2.82 | 2.82 | 2.82 |
| 20 | *Naganishia* | 1 | 1.21 | 1.21 | 1.21 |
| 20 | *Neodevriesia* | 1 | 1.03 | 1.03 | 1.03 |
| 20 | *Neosetophoma* | 1 | 0.97 | 0.97 | 0.97 |
| 20 | *Ophiosphaerella* | 1 | 3.38 | 3.38 | 3.38 |
| 20 | *Penicillium* | 1 | 16.34 | 16.34 | 16.34 |
| 20 | *Peniophorella* | 1 | 5.47 | 5.47 | 5.47 |
| 20 | *Phellinus* | 1 | 2.39 | 2.39 | 2.39 |
| 20 | *Phlebiopsis* | 1 | 1.24 | 1.24 | 1.24 |
| 20 | *Postia* | 1 | 4.07 | 4.07 | 4.07 |
| 20 | *Pseudopithomyces* | 1 | 2.13 | 2.13 | 2.13 |
| 20 | *Ramularia* | 1 | 12.47 | 12.47 | 12.47 |
| 20 | *Rhodosporidiobolus* | 1 | 2.07 | 2.07 | 2.07 |
| 20 | *Rigidoporus* | 1 | 1.19 | 1.19 | 1.19 |
| 20 | *Simplicillium* | 1 | 4.10 | 4.10 | 4.10 |
| 20 | *Skvortzovia* | 1 | 2.96 | 2.96 | 2.96 |
| 20 | *Stereum* | 1 | 1.51 | 1.51 | 1.51 |
| 20 | *Strobilurus* | 1 | 1.44 | 1.44 | 1.44 |
| 20 | *Stypella* | 1 | 2.38 | 2.38 | 2.38 |
| 20 | *Trametes* | 1 | 5.78 | 5.78 | 5.78 |
| 20 | *Tricholosporum* | 1 | 1.08 | 1.08 | 1.08 |
| 20 | *Tylopilus* | 1 | 1.16 | 1.16 | 1.16 |
| 20 | *Tyromyces* | 1 | 1.35 | 1.35 | 1.35 |
| 20 | *Xeromphalina* | 1 | 3.25 | 3.25 | 3.25 |
| 20 | *Xiliomyces* | 1 | 1.25 | 1.25 | 1.25 |
| 20 | *Yuchengia* | 1 | 4.13 | 4.13 | 4.13 |

**Table S6.** Top 30 fungal genera in cleaning effluent of ACs

| Rank order | Genus | Detection Frequently | % of Total Fungal Read (Median) | % of Total Fungal Read (IQR1) | % of Total Fungal Read  (IQR3) |
| --- | --- | --- | --- | --- | --- |
| 1 | *Toxicocladosporium* | 15 | 18.71 | 12.27 | 35.12 |
| 2 | *Cladosporium* | 12 | 14.21 | 2.83 | 38.68 |
| 3 | *Acrodontium* | 6 | 5.41 | 2.68 | 25.20 |
| 3 | *Rhodotorula* | 6 | 16.07 | 9.52 | 22.00 |
| 5 | *Aureobasidium* | 5 | 2.45 | 2.21 | 2.45 |
| 5 | *Penicillium* | 5 | 7.45 | 7.16 | 9.48 |
| 7 | *Aspergillus* | 4 | 5.18 | 1.61 | 9.94 |
| 7 | *Simplicillium* | 4 | 1.87 | 1.72 | 3.55 |
| 9 | *Candida* | 3 | 0.98 | 0.98 | 1.49 |
| 9 | *Exophiala* | 3 | 11.78 | 7.72 | 25.88 |
| 9 | *Lachnum* | 3 | 5.77 | 4.74 | 13.50 |
| 9 | *Sporidiobolus* | 3 | 4.59 | 2.94 | 5.79 |
| 9 | *Talaromyces* | 3 | 18.86 | 10.18 | 32.53 |
| 14 | *Knufia* | 2 | 1.48 | 1.38 | 1.58 |
| 4 | *Sebacina* | 2 | 1.21 | 1.19 | 1.23 |
| 14 | *Sterigmatomyces* | 2 | 10.54 | 6.10 | 14.97 |
| 14 | *Zasmidium* | 2 | 3.62 | 3.40 | 3.84 |
| 18 | *Botryosphaeria* | 1 | 1.18 | 1.18 | 1.18 |
| 18 | *Catenulomyces* | 1 | 2.18 | 2.18 | 2.18 |
| 18 | *Coprinellus* | 1 | 8.60 | 8.60 | 8.60 |
| 18 | *Coprinopsis* | 1 | 16.63 | 16.63 | 16.63 |
| 18 | *Eutypa* | 1 | 3.11 | 3.11 | 3.11 |
| 18 | *Gloeoporus* | 1 | 1.63 | 1.63 | 1.63 |
| 18 | *Hydnophlebia* | 1 | 1.02 | 1.02 | 1.02 |
| 18 | *Hymenochaete* | 1 | 0.95 | 0.95 | 0.95 |
| 18 | *Hyphodontia* | 1 | 3.60 | 3.60 | 3.60 |
| 18 | *Junghuhnia* | 1 | 2.22 | 2.22 | 2.22 |
| 18 | *Meripilus* | 1 | 6.35 | 6.35 | 6.35 |
| 18 | *Meyerozyma* | 1 | 7.83 | 7.83 | 7.83 |
| 18 | *Mycoacia* | 1 | 3.70 | 3.70 | 3.70 |
| 18 | *Naganishia* | 1 | 1.87 | 1.87 | 1.87 |
| 18 | *Neoantrodiella* | 1 | 4.21 | 4.21 | 4.21 |
| 18 | *Neodevriesia* | 1 | 10.00 | 10.00 | 10.00 |
| 18 | *Ophiosphaerella* | 1 | 3.48 | 3.48 | 3.48 |
| 18 | *Phanerochaete* | 1 | 1.13 | 1.13 | 1.13 |
| 18 | *Phellinus* | 1 | 2.10 | 2.10 | 2.10 |
| 18 | *Phialocephala* | 1 | 10.96 | 10.96 | 10.96 |
| 18 | *Phlebia* | 1 | 5.70 | 5.70 | 5.70 |
| 18 | *Pleurotus* | 1 | 14.21 | 14.21 | 14.21 |
| 18 | *Pseudonadsoniella* | 1 | 9.08 | 9.08 | 9.08 |
| 18 | *Sakaguchia* | 1 | 1.13 | 1.13 | 1.13 |
| 18 | *Skvortzovia* | 1 | 6.30 | 6.30 | 6.30 |
| 18 | *Stypella* | 1 | 3.64 | 3.64 | 3.64 |
| 18 | *Trametes* | 1 | 2.17 | 2.17 | 2.17 |
| 18 | *Tricholomopsis* | 1 | 1.21 | 1.21 | 1.21 |
| 18 | *Tricholosporum* | 1 | 1.07 | 1.07 | 1.07 |
| 18 | *Trichophyton* | 1 | 1.87 | 1.87 | 1.87 |

**Table S7.** Top 30 fungal genera in indoor air

| Rank order | Genus | Detection Frequently | % of Total Fungal Read (Median) | % of Total Fungal Read (IQR1) | % of Total Fungal Read  (IQR3) |
| --- | --- | --- | --- | --- | --- |
| 1 | *Cladosporium* | 10 | 29.87 | 18.58 | 32.31 |
| 2 | *Aspergillus* | 5 | 6.28 | 2.12 | 6.93 |
| 2 | *Toxicocladosporium* | 5 | 28.97 | 4.25 | 29.44 |
| 4 | *Trametes* | 4 | 13.41 | 10.34 | 15.49 |
| 5 | *Aureobasidium* | 3 | 8.15 | 5.33 | 18.47 |
| 5 | *Exophiala* | 3 | 6.08 | 4.17 | 7.55 |
| 5 | *Penicillium* | 3 | 2.90 | 2.49 | 3.08 |
| 8 | *Alternaria* | 2 | 35.64 | 18.45 | 52.83 |
| 8 | *Ganoderma* | 2 | 8.37 | 5.61 | 11.13 |
| 8 | *Nigrospora* | 2 | 50.33 | 25.76 | 74.91 |
| 8 | *Peniophora* | 2 | 18.39 | 10.26 | 26.51 |
| 8 | *Rhodotorula* | 2 | 7.31 | 6.15 | 8.48 |
| 8 | *Simplicillium* | 2 | 4.48 | 3.67 | 5.28 |
| 14 | *Acrodontium* | 1 | 2.77 | 2.77 | 2.77 |
| 14 | *Boidinia* | 1 | 9.89 | 9.89 | 9.89 |
| 14 | *Cerrena* | 1 | 70.52 | 70.52 | 70.52 |
| 14 | *Coprinellus* | 1 | 7.21 | 7.21 | 7.21 |
| 14 | *Cytospora* | 1 | 7.08 | 7.08 | 7.08 |
| 14 | *Fusarium* | 1 | 1.56 | 1.56 | 1.56 |
| 14 | *Geastrum* | 1 | 10.45 | 10.45 | 10.45 |
| 14 | *Gloeoporus* | 1 | 8.53 | 8.53 | 8.53 |
| 14 | *Hyphodontia* | 1 | 57.08 | 57.08 | 57.08 |
| 14 | *Hypholoma* | 1 | 70.66 | 70.66 | 70.66 |
| 14 | *Junghuhnia* | 1 | 40.16 | 40.16 | 40.16 |
| 14 | *Knufia* | 1 | 10.30 | 10.30 | 10.30 |
| 14 | *Lachnum* | 1 | 3.80 | 3.80 | 3.80 |
| 14 | *Meripilus* | 1 | 17.73 | 17.73 | 17.73 |
| 14 | *Meyerozyma* | 1 | 2.81 | 2.81 | 2.81 |
| 14 | *Mollisia* | 1 | 4.48 | 4.48 | 4.48 |
| 14 | *Mycosphaerella* | 1 | 34.35 | 34.35 | 34.35 |
| 14 | *Neoantrodiella* | 1 | 4.42 | 4.42 | 4.42 |
| 14 | *Neodevriesia* | 1 | 5.10 | 5.10 | 5.10 |
| 14 | *Peniophorella* | 1 | 99.99 | 99.99 | 99.99 |
| 14 | *Phaeosphaeria* | 1 | 7.79 | 7.79 | 7.79 |
| 14 | *Phialocephala* | 1 | 3.12 | 3.12 | 3.12 |
| 14 | *Phoma* | 1 | 33.58 | 33.58 | 33.58 |
| 14 | *Pleurotus* | 1 | 3.07 | 3.07 | 3.07 |
| 14 | *Pseudonadsoniella* | 1 | 8.55 | 8.55 | 8.55 |
| 14 | *Pseudopithomyces* | 1 | 16.58 | 16.58 | 16.58 |
| 14 | *Ramularia* | 1 | 3.72 | 3.72 | 3.72 |
| 14 | *Sebacina* | 1 | 1.48 | 1.48 | 1.48 |
| 14 | *Septoria* | 1 | 100.00 | 100.00 | 100.00 |
| 14 | *Spadicoides* | 1 | 7.86 | 7.86 | 7.86 |
| 14 | *Sporidiobolus* | 1 | 1.69 | 1.69 | 1.69 |
| 14 | *Steccherinum* | 1 | 58.70 | 58.70 | 58.70 |
| 14 | *Stereum* | 1 | 1.37 | 1.37 | 1.37 |
| 14 | *Sterigmatomyces* | 1 | 2.10 | 2.10 | 2.10 |
| 14 | *Strobilurus* | 1 | 41.93 | 41.93 | 41.93 |
| 14 | *Talaromyces* | 1 | 24.90 | 24.90 | 24.90 |
| 14 | *Tulasnella* | 1 | 0.95 | 0.95 | 0.95 |
| 14 | *Wallemia* | 1 | 56.07 | 56.07 | 56.07 |
| 14 | *Xeromphalina* | 1 | 12.46 | 12.46 | 12.46 |
| 14 | *Zasmidium* | 1 | 1.58 | 1.58 | 1.58 |

**Table S8.** Top 30 fungal genera in house dust

| Rank order | Genus | Detection Frequently | % of Total Fungal Read (Median) | % of Total Fungal Read (IQR1) | % of Total Fungal Read  (IQR3) |
| --- | --- | --- | --- | --- | --- |
| 1 | *Cladosporium* | 15 | 16.35 | 8.85 | 31.93 |
| 2 | *Toxicocladosporium* | 9 | 6.69 | 1.68 | 13.98 |
| 2 | *Aspergillus* | 9 | 5.90 | 2.20 | 22.81 |
| 4 | *Curvularia* | 8 | 3.39 | 2.21 | 6.76 |
| 4 | *Candida* | 8 | 3.64 | 2.82 | 7.18 |
| 4 | *Alternaria* | 8 | 4.53 | 4.27 | 9.88 |
| 7 | *Rhodotorula* | 7 | 5.39 | 2.73 | 11.67 |
| 7 | *Aureobasidium* | 7 | 10.59 | 6.00 | 16.39 |
| 9 | *Sterigmatomyces* | 6 | 5.69 | 3.25 | 10.95 |
| 9 | *Pseudopithomyces* | 6 | 2.42 | 1.56 | 3.66 |
| 9 | *Phoma* | 6 | 1.65 | 1.34 | 3.04 |
| 12 | *Neoantrodiella* | 4 | 2.10 | 1.33 | 3.86 |
| 12 | *Naganishia* | 4 | 5.46 | 4.46 | 19.83 |
| 12 | *Debaryomyces* | 4 | 42.05 | 21.60 | 59.50 |
| 15 | *Meyerozyma* | 3 | 3.46 | 2.38 | 3.59 |
| 15 | *Didymella* | 3 | 2.00 | 1.52 | 2.34 |
| 17 | *Schizophyllum* | 2 | 2.27 | 1.62 | 2.92 |
| 17 | *Phlebia* | 2 | 1.26 | 1.13 | 1.39 |
| 17 | *Peniophorella* | 2 | 2.44 | 2.41 | 2.46 |
| 17 | *Penicillium* | 2 | 22.58 | 14.58 | 30.58 |
| 17 | *Mucor* | 2 | 2.84 | 2.45 | 3.23 |
| 17 | *Meripilus* | 2 | 2.88 | 2.62 | 3.13 |
| 17 | *Hyphodontia* | 2 | 1.73 | 1.53 | 1.93 |
| 17 | *Filobasidium* | 2 | 2.27 | 1.87 | 2.67 |
| 17 | *Erythrobasidium* | 2 | 1.82 | 1.56 | 2.09 |
| 17 | *Blastobotrys* | 2 | 3.42 | 2.45 | 4.40 |
| 27 | *Wallemia* | 1 | 1.92 | 1.92 | 1.92 |
| 27 | *Tzeanania* | 1 | 2.03 | 2.03 | 2.03 |
| 27 | *Trichophyton* | 1 | 1.02 | 1.02 | 1.02 |
| 27 | *Trichomerium* | 1 | 6.70 | 6.70 | 6.70 |
| 27 | *Trametes* | 1 | 2.96 | 2.96 | 2.96 |
| 27 | *Tausonia* | 1 | 1.42 | 1.42 | 1.42 |
| 27 | *Talaromyces* | 1 | 3.95 | 3.95 | 3.95 |
| 27 | *Spiromastix* | 1 | 1.06 | 1.06 | 1.06 |
| 27 | *Simplicillium* | 1 | 1.09 | 1.09 | 1.09 |
| 27 | *Sidera* | 1 | 2.83 | 2.83 | 2.83 |
| 27 | *Septoria* | 1 | 1.16 | 1.16 | 1.16 |
| 27 | *Schizopora* | 1 | 2.63 | 2.63 | 2.63 |
| 27 | *Sakaguchia* | 1 | 1.61 | 1.61 | 1.61 |
| 27 | *Resinicium* | 1 | 1.29 | 1.29 | 1.29 |
| 27 | *Paraphoma* | 1 | 2.78 | 2.78 | 2.78 |
| 27 | *Ophiosphaerella* | 1 | 1.17 | 1.17 | 1.17 |
| 27 | *Neoascochyta* | 1 | 1.22 | 1.22 | 1.22 |
| 27 | *Mrakia* | 1 | 1.40 | 1.40 | 1.40 |
| 27 | *Lichtheimia* | 1 | 4.04 | 4.04 | 4.04 |
| 27 | *Lachnum* | 1 | 1.44 | 1.44 | 1.44 |
| 27 | *Kazachstania* | 1 | 2.85 | 2.85 | 2.85 |
| 27 | *Hydnochaete* | 1 | 2.99 | 2.99 | 2.99 |
| 27 | *Gibberella* | 1 | 10.38 | 10.38 | 10.38 |
| 27 | *Fusarium* | 1 | 4.67 | 4.67 | 4.67 |
| 27 | *Exophiala* | 1 | 6.02 | 6.02 | 6.02 |
| 27 | *Dendryphiella* | 1 | 1.00 | 1.00 | 1.00 |
| 27 | *Cladophialophora* | 1 | 0.97 | 0.97 | 0.97 |
| 27 | *Ceriporia* | 1 | 1.18 | 1.18 | 1.18 |
| 27 | *Catenulomyces* | 1 | 1.25 | 1.25 | 1.25 |
| 27 | *Acrodontium* | 1 | 27.55 | 27.55 | 27.55 |

**Figure S1. Correlation between the years of AC use and** **fungal accumulation**

Plotted estimated fungal genome copy number of AC cleaning effluent against years of AC use. Analysis with Spearman's rank correlation coefficient showed a correlation between years of AC use and fungal contamination (r = 0.51, P = 0.04).
